# Supplementary material for: Preparation and corrosion inhibition mechanism of a chitosan ionic liquid Schiff base for the protection of N80 in HCl solution
Source: Royal Society of Chemistry journal article supplement (doi:10.1039/d3nj05103j), 2024-01-01
Supplement: d3nj05103j1.pdf [file d3nj05103j1.pdf]

## *Supporting Information*

### Preparation and corrosion inhibition mechanism of a Chitosan ion liquid Schiff base for protection of N80 in HCl solution

Miantuo Li<sup>1,2</sup>, Fengting Li<sup>1,2</sup>, Jianwen Hu<sup>1,2</sup>, Nannan Cui<sup>1,2</sup>, Huiling Su<sup>1,2</sup>, Lizhi Li<sup>1,2</sup>,  
Zhikun Wang<sup>1,2,\*</sup>, Shuangqing Sun<sup>1,2</sup>, Songqing Hu<sup>1,2,\*</sup>

<sup>1</sup> *School of Materials Science and Engineering, China University of Petroleum (East  
China), Qingdao 266580, PR China*

<sup>2</sup> *Institute of Advanced Materials, China University of Petroleum (East China),  
Qingdao 266580, PR China*

As shown in Fig. S1 and Table S1, the molecular weight of CS ( $M_n=3000$ ) is increased after the ionic liquidization and the Schiff alkalization, which is mainly due to the introduction of PTSA and Schiff base groups on the molecular chain of CS. Among three CS-IL-SBs inhibitors, the molecular weight of CS-IL-Vin is the largest, possibly because more vanilla groups are grafted to CS-IL.

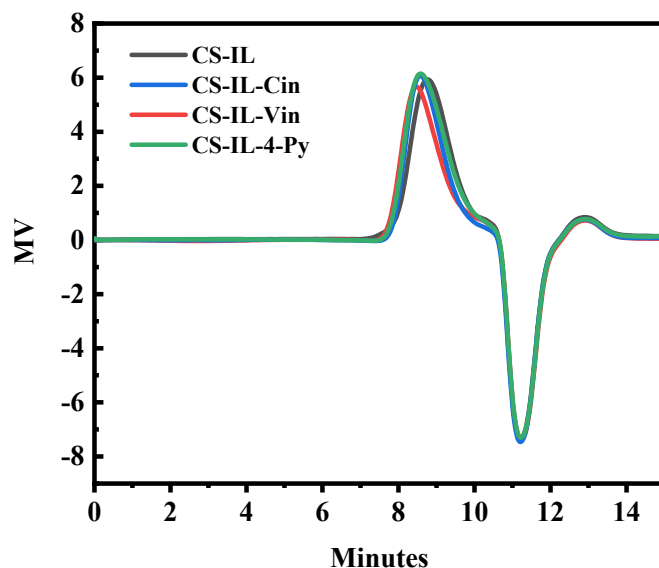

**Fig S1.** Outflow curves of the obtained CS-IL and CS-IL-SBs

**Table S1.** Molecular weight tests of the obtained CS-IL and CS-IL-SBs

| Distribution Name | $M_n$ (Daltons) | MP (Daltons) |
|-------------------|-----------------|--------------|
| CS-IL             | 3329            | 7358         |
| CS-IL-Cin         | 5280            | 10429        |
| CS-IL-Vin         | 6177            | 12860        |
| CS-IL-4-Py        | 4646            | 10293        |

**Table S2.** Comparative table of Chitosan Schiff base corrosion inhibitors

| <b>Chitosan Schiff base corrosion inhibitors</b> | <b>Corrosive environment</b> | <b>Concentration</b> | <b>Corrosion inhibition efficiency</b> | <b>reference</b> |
|--------------------------------------------------|------------------------------|----------------------|----------------------------------------|------------------|
| Our products                                     | 15% HCl solution             | 400mg/L              | 93.45%                                 |                  |
| Chitosan cinnamaldehyde                          | 15% HCl solution             | 400mg/L              | 85.16%                                 | [1]              |
| Chitosan thiophene carboxaldehyde                | 1 M HCl solution             | 1500ppm              | 92%                                    | [2]              |
| Chitosan salicylaldehyde                         | 1 M HCl solution             | 1500ppm              | 91%                                    | [3]              |
| Chitosan vanillin                                | 1 M HCl solution             | 1500ppm              | 91.1%                                  | [4]              |
| Chitosan benzaldehyde                            | 1 M HCl solution             | 800mg/L              | 87.11%                                 | [5]              |
| Salicylaldehyde-Chitosan                         | 3.5% NaCl solution           | 150mg/L              | 95.2%                                  | [6]              |
| Chitosan 4-pyridinecarboxaldehyde-CuO            | 3.5% NaCl solution           | 200ppm               | 94.5%                                  | [7]              |
| Chitosan vanillin-ZnO                            | 3.5% NaCl solution           | 200ppm               | 95.96%                                 | [8]              |

Fig. S2 indicates the thermogravimetric analysis (TGA) of pristine CS and its corresponding CS-IL and CS-IL-SBs. For CS, the first thermal degradation occurs at 110 °C, with a weight loss of 9 % attributed to the loss of water molecules. While the second thermal loss starts around 250 °C and exhibits a mass loss of 33 % at 310 °C. This is caused by the thermal degradation of the pyranose ring on CS, which resulted in the broken of the glycosidic linkages between *N*-acetylglucosamine rings and glucosamine, and the release of volatile compounds. CS-IL undergoes three thermal degradations, the first and second thermal degradations are consistent with that of CS. While the third thermal loss starts around 312 °C and exhibits a mass loss of 28 % at 406 °C. This is caused by the thermal degradation of the PTSA. For CS-IL-SBs, all polymers undergo three major thermal degradation steps. The first decomposition step is due to loss of water molecule. The second degradation step occurring in the range of 220 °C–310 °C is due to depolymerization of Schiff bases. While the third thermal loss occurs in the range of 340 °C–430 °C. This is caused by the thermal degradation of PTSA. Because of the Schiff base group grafted on CS-IL, the pyrolysis temperature of PTSA group may increase, and the pyrolysis curve of CS-IL-SBs may shift to the right. The main thermal degradation step of CS-IL-SBs indicates that ionic liquid Schiff base polymer is more stable than CS. The stability of the ionic liquid Schiff base polymer compared to CS may be due to the grafting of PTSA and aldehyde groups on the CS matrix.

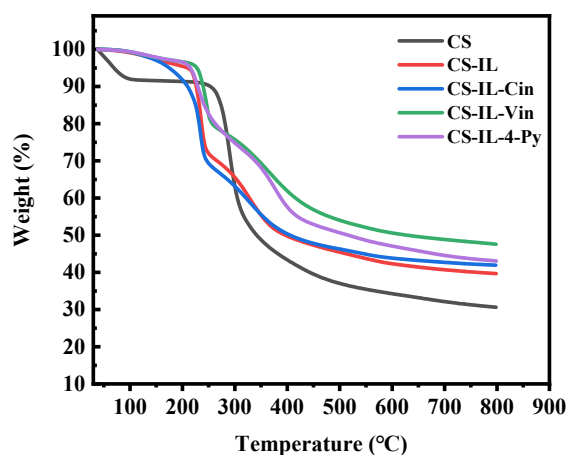

**Fig. S2** Thermogravimetric analysis (TGA) of pristine CS and its corresponding CS-IL and CS-IL-SBs

Fig. S3 provides the X-ray diffraction (XRD) examination of pristine CS and its corresponding CS-IL and CS-IL-SBs. As shown in Fig S3, the XRD of pure CS and CS derivatives are similar and exhibit peak at the  $2\theta$  diffraction angle of  $20^\circ$ . The reason for this is that CS has a significant number of OH groups in its repeating units, which are highly polar and enable the formation of a large number of inter- and intra-molecular hydrogen bonds. In comparison to pure CS, CS-IL and CS-IL-SBs have less intense and much broader peaks, indicating that grafting CS with PTSA and Schiff base groups deform the crystal zone in the CS system, making it less crystalline.<sup>9</sup>

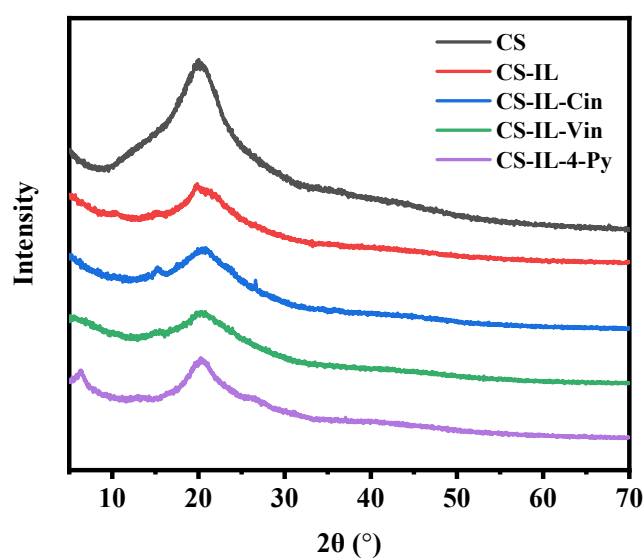

**Fig. S3** X-ray diffraction (XRD) tests of pristine CS and its corresponding CS-IL and CS-IL-SBs

Zeta potential is an important indicator to characterize the stability of as-prepared CS-IL-SBs solution (Fig. S4). In general, the smaller the absolute value of zeta potential is, the worse the stability of dispersion system is. It could be seen that the zeta potentials of as-prepared CS-IL-SBs in 15% HCl solution are positive, indicating that the surfaces of CS-IL-SBs are positively charged. With the introduction of Schiff base groups into CS-IL, the value of zeta potential has been increased, indicating that the dispersion of CS-IL is improved in 15% HCl solution. Among three CS-IL-SBs inhibitors, the CS-IL-Vin inhibitor presents the highest value of zeta potential, suggesting the best stability in 15% HCl solution. CS-IL-SBs show high value of zeta potential in 15% HCl solution because the introduction of PTSA and Schiff base groups can improve the stability of corrosion inhibitor molecules.

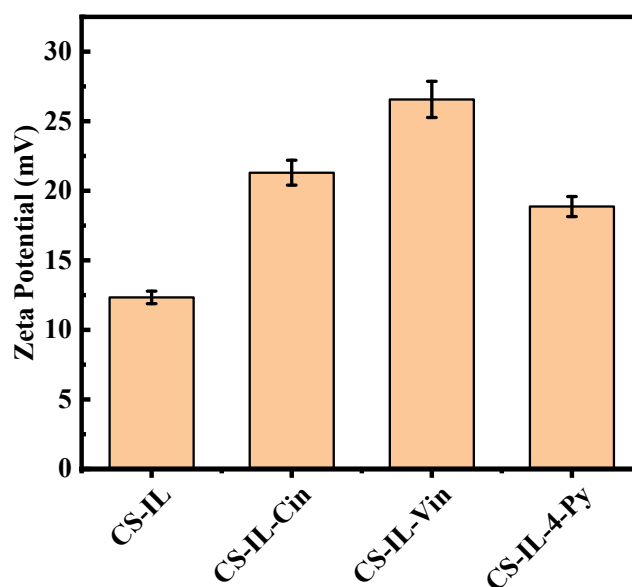

**Fig. S4** Zeta potential tests of synthesized CS-IL and CS-IL-SBs

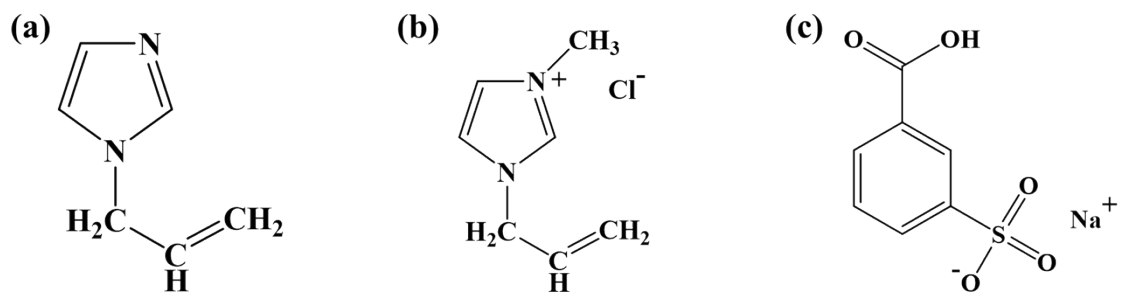

**Fig. S5** Molecular structure formula of three compound auxiliaries, (a) 1-allylimidazole, (b) 1-allyl-3-methylimidazole chloride, and (c) sodium 3-carboxybenzene sulfonate.

Fig. S6 displays the corresponding contact angle (CA) of the investigated N80 steel surfaces with and without the addition of corrosion inhibitors. It's clear that the value of CA can be increased after introducing CS-IL-SBs into 15% HCl solution, which further indicate that the adsorbed CS-IL-SBs film could impede the contact of water to N80 steel surface. Thus, the corrosion of metal will be inhibited.

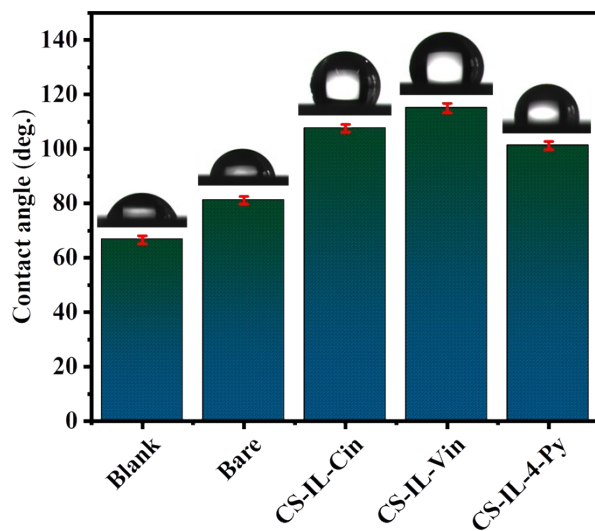

**Fig. S6** Contact angle tests of the steel before and after treatment of CS-IL-SBs



**Table S3.** Thermodynamic parameters of adsorption isotherm.

| <b>Inhibitor</b> | <b>R<sup>2</sup></b> | <b>Slope</b> | <b>K<sub>ads</sub></b> | <b>ΔG<sub>ads</sub><sup>0</sup> (kJ/mol)</b> |
|------------------|----------------------|--------------|------------------------|----------------------------------------------|
| CS               | 0.99927              | 0.01676      | 59.67                  | -20.081                                      |
| CS-IL            | 0.99989              | 0.01579      | 63.33                  | -20.228                                      |
| CS-IL-Cin        | 0.99341              | 0.01118      | 89.44                  | -21.084                                      |
| CS-IL-Vin        | 0.98421              | 0.01119      | 89.37                  | -21.082                                      |
| CS-IL-4-Py       | 0.99934              | 0.01328      | 75.30                  | -20.658                                      |

**Table S4.** EIS fitted electrochemical parameters for the N80 steel in 15% HCl solution containing different concentrations of CS-IL-SBs at 298 K.

| <b>Inhibitors</b> | <b>Concentration<br/>(mg/L)</b> | $R_s$<br>( $\Omega/\text{cm}^2$ ) | $f$   | $Y_0$<br>( $10^{-6}$ S.Secn/ $\text{cm}^2$ ) | $n$    | $CPE_{dl}$ | $R_{ct}$<br>( $\Omega/\text{cm}^2$ ) | $\eta$<br>(%) |
|-------------------|---------------------------------|-----------------------------------|-------|----------------------------------------------|--------|------------|--------------------------------------|---------------|
| blank             | 0                               | 0.7089                            | 21.65 | 280.5                                        | 0.8166 | 113.93     | 45.21                                | -             |
| CS-IL-Cin         | 50                              | 0.3035                            | 24.93 | 242.4                                        | 0.7619 | 72.77      | 115.6                                | 60.9          |
|                   | 100                             | 0.5780                            | 12.40 | 168.6                                        | 0.7827 | 65.43      | 173.7                                | 74.0          |
|                   | 200                             | 0.9118                            | 7.94  | 129.9                                        | 0.7945 | 58.17      | 273.8                                | 83.5          |
|                   | 300                             | 0.8241                            | 7.94  | 137.8                                        | 0.7765 | 57.51      | 342.3                                | 86.8          |
|                   | 400                             | 0.9567                            | 5.00  | 142.9                                        | 0.7845 | 67.98      | 422.0                                | 89.3          |
| CS-IL-Vin         | 50                              | 1.064                             | 106.8 | 183.1                                        | 0.8448 | 66.68      | 245.8                                | 81.6          |
|                   | 100                             | 1.161                             | 235.5 | 150.9                                        | 0.8195 | 40.41      | 458.7                                | 90.1          |
|                   | 200                             | 1.334                             | 218.3 | 138.7                                        | 0.8814 | 58.88      | 461.1                                | 90.2          |
|                   | 300                             | 1.229                             | 263.1 | 141.6                                        | 0.8232 | 38.20      | 578.7                                | 92.2          |
|                   | 400                             | 1.212                             | 450.1 | 102.7                                        | 0.8727 | 37.34      | 916.1                                | 95.1          |
| CS-IL-4-Py        | 50                              | 0.7146                            | 31.25 | 184.9                                        | 0.8819 | 99.11      | 55.94                                | 19.2          |
|                   | 100                             | 0.7466                            | 12.40 | 173.7                                        | 0.8438 | 87.97      | 126.7                                | 64.3          |
|                   | 200                             | 0.6385                            | 9.93  | 142.3                                        | 0.8383 | 72.93      | 188.7                                | 76.0          |
|                   | 300                             | 0.6518                            | 15.63 | 170.7                                        | 0.8430 | 83.07      | 125.4                                | 63.9          |
|                   | 400                             | 0.6007                            | 15.62 | 140.1                                        | 0.8415 | 67.72      | 137.6                                | 67.1          |

**Table S5.** Fitted electrochemical parameters from polarization curves tests for the N80 steel in 15% HCl solution containing different concentrations of CS-IL-SBs.

| <b>Inhibitor</b> | <b>Conc.<br/>(mg/L)</b> | <b><math>\beta_a</math><br/>(mV/dec)</b> | <b><math>-\beta_c</math><br/>(mV/dec)</b> | <b><math>E_{corr}</math><br/>(mV/SCE)</b> | <b><math>I_{corr}</math><br/>(<math>\mu\text{A}/\text{cm}^2</math>)</b> | <b><math>\eta</math><br/>(%)</b> |
|------------------|-------------------------|------------------------------------------|-------------------------------------------|-------------------------------------------|-------------------------------------------------------------------------|----------------------------------|
| blank            | —                       | 80.3                                     | 76.8                                      | -426                                      | 380.0                                                                   | —                                |
| CS-IL-Cin        | 50                      | 128.6                                    | 115                                       | -452                                      | 151.5                                                                   | 60.14                            |
|                  | 100                     | 112.4                                    | 113                                       | -452                                      | 125.5                                                                   | 66.97                            |
|                  | 200                     | 120.0                                    | 124.3                                     | -450                                      | 105.2                                                                   | 72.31                            |
|                  | 300                     | 124.9                                    | 115                                       | -451                                      | 89.3                                                                    | 76.51                            |
|                  | 400                     | 122.9                                    | 102.1                                     | -446                                      | 66.8                                                                    | 82.43                            |
| CS-IL-Vin        | 50                      | 106.1                                    | 105.6                                     | -438                                      | 150.2                                                                   | 60.48                            |
|                  | 100                     | 126.1                                    | 107.3                                     | -453                                      | 125.4                                                                   | 66.99                            |
|                  | 200                     | 159.2                                    | 106.2                                     | -456                                      | 100.4                                                                   | 73.58                            |
|                  | 300                     | 138.6                                    | 129.9                                     | -458                                      | 76.7                                                                    | 79.82                            |
|                  | 400                     | 121.7                                    | 119.4                                     | -457                                      | 54.1                                                                    | 85.76                            |
| CS-IL-4-Py       | 50                      | 70.8                                     | 81.1                                      | -425                                      | 148.7                                                                   | 60.87                            |
|                  | 100                     | 98.4                                     | 79.2                                      | -431                                      | 121.1                                                                   | 68.14                            |
|                  | 200                     | 78.6                                     | 77.2                                      | -428                                      | 100.5                                                                   | 73.54                            |
|                  | 300                     | 133.7                                    | 87.3                                      | -432                                      | 83.9                                                                    | 77.93                            |
|                  | 400                     | 91.8                                     | 42.4                                      | -437                                      | 78.4                                                                    | 79.38                            |

**Table S6.** Laser confocal micro-morphology roughness parameters of the N80 steel after corrosion in 15% HCl solution without or with 400 mg/L CS-IL- SBs at 298 K for 24 h.

| —          | $S_z$<br>( $\mu\text{m}$ ) | $S_a$<br>( $\mu\text{m}$ ) | $S_{tr}$ | $S_{pc}$<br>(1/mm) |
|------------|----------------------------|----------------------------|----------|--------------------|
| Blank      | 0.447                      | 5.645                      | 0.765    | 649.968            |
| CS-IL-Cin  | 0.395                      | 4.550                      | 0.534    | 595.829            |
| CS-IL-Vin  | 0.311                      | 3.829                      | 0.076    | 499.279            |
| CS-IL-4-Py | 0.407                      | 4.764                      | 0.110    | 624.087            |

**Table S7.** Global activity parameters of CS-IL and CS-IL-SBs corrosion inhibitors.

| <b>Inhibitor</b> | <b><math>\mu/\text{eV}</math></b> | <b><math>\eta/\text{eV}</math></b> | <b><math>S/(1/\text{eV})</math></b> | <b><math>\omega/\text{eV}</math></b> | <b><math>\Delta N</math></b> |
|------------------|-----------------------------------|------------------------------------|-------------------------------------|--------------------------------------|------------------------------|
| CS-IL            | -2.946                            | 2.181                              | 0.458                               | 1.990                                | 0.929                        |
| CS-IL-Cin        | -3.931                            | 1.459                              | 0.685                               | 5.296                                | 1.052                        |
| CS-IL-Vin        | -3.978                            | 1.192                              | 0.839                               | 6.638                                | 1.268                        |
| CS-IL-4-Py       | -3.075                            | 1.597                              | 0.626                               | 2.960                                | 1.229                        |

**Table S8.** Fukui indices of CS-IL and CS-IL-SBs corrosion inhibitors.

| CS-IL |                |                | CS-IL-Cin |                |                | CS-IL-Vin |                |                | CS-IL-4-Py |                |                |
|-------|----------------|----------------|-----------|----------------|----------------|-----------|----------------|----------------|------------|----------------|----------------|
| Atom  | $f(\vec{r})^+$ | $f(\vec{r})^-$ | Atom      | $f(\vec{r})^+$ | $f(\vec{r})^-$ | Atom      | $f(\vec{r})^+$ | $f(\vec{r})^-$ | Atom       | $f(\vec{r})^+$ | $f(\vec{r})^-$ |
| O1    | 0.004          | 0.012          | O3        | 0.018          | 0.046          | N8        | 0.100          | 0.051          | N8         | 0.110          | 0.005          |
| N9    | 0.000          | 0.084          | N8        | 0.080          | 0.002          | C22       | 0.102          | 0.020          | S28        | 0.001          | 0.046          |
| N31   | 0.003          | 0.001          | O13       | 0.017          | 0.009          | C23       | 0.038          | 0.051          | O29        | 0.006          | 0.128          |
| N54   | 0.005          | 0.065          | C22       | 0.075          | 0.009          | C24       | 0.053          | 0.046          | O30        | 0.005          | 0.113          |
| S77   | 0.020          | 0.029          | C23       | 0.069          | 0.007          | C25       | 0.040          | 0.035          | O31        | 0.002          | 0.099          |
| O78   | 0.027          | 0.071          | C24       | 0.090          | 0.012          | C26       | 0.066          | 0.050          | C40        | 0.095          | 0.004          |
| O79   | 0.027          | 0.063          | C25       | 0.020          | 0.002          | C27       | 0.032          | 0.044          | C41        | 0.057          | 0.002          |
| O80   | 0.037          | 0.077          | C26       | 0.041          | 0.007          | C28       | 0.045          | 0.024          | C42        | 0.056          | 0.004          |
|       |                |                | C27       | 0.036          | 0.008          | O29       | 0.058          | 0.072          | C43        | 0.065          | 0.008          |
|       |                |                | C28       | 0.068          | 0.014          | O30       | 0.021          | 0.042          | N44        | 0.102          | 0.025          |
|       |                |                | C29       | 0.038          | 0.007          | N68       | 0.001          | 0.000          | C45        | 0.056          | 0.008          |
|       |                |                | C30       | 0.040          | 0.006          | S92       | 0.002          | 0.014          | C46        | 0.065          | 0.005          |
|       |                |                | S45       | 0.001          | 0.043          | O93       | 0.003          | 0.034          | N80        | 0.001          | 0.007          |
|       |                |                | O46       | 0.005          | 0.101          | O94       | 0.001          | 0.031          |            |                |                |
|       |                |                | O47       | 0.002          | 0.107          | O95       | 0.001          | 0.039          |            |                |                |
|       |                |                | O48       | 0.000          | 0.115          |           |                |                |            |                |                |
|       |                |                | N85       | 0.001          | 0.002          |           |                |                |            |                |                |

## References

- 1 D. S. Chauhan, M. A. J. Mazumder, M. A. Quraishi and K. R. Ansari, Chitosan-cinnamaldehyde Schiff base: A bioinspired macromolecule as corrosion inhibitor for oil and gas industry, *Int. J. Biol. Macromol.*, 2020, **158**, 127–138.
- 2 R. Menaka and S. Subhashini, Chitosan Schiff base as effective corrosion inhibitor for mild steel in acid medium, *Polym. Int.*, 2016, **66**, 349–358.
- 3 R. Menaka and S. Subhashini, Chitosan Schiff base as eco-friendly inhibitor for mild steel corrosion in 1 M HCl, *J Adhes Sci Technol*, 2016, **66**, 349–358.
- 4 M. Ramanathan, G. Rajendran and S. Sethumanickam, Eco-friendly chitosan vanillin Schiff base as anti-corrosive agent for mild steel in 1 M HCl and as scale inhibitor for CaCO<sub>3</sub>, *J. Adhes. Sci Technol.*, 2022, 36, 2588–2611.
- 5 J. Wu, J. Wu, L. L. Lu and P. Mei, 8-Hydroxyquinoline-functionalized chitosan Schiff base as an efficient and environmentally friendly corrosion inhibitor for N80 steel in acidic environments, *J. Appl. Polym. Sci.*, 2023, 140, e54073.
- 6 K. P. Ansari, D. D. Chauhan, M. A. Quraishi and A. J. Mohammad, Chitosan Schiff base: an environmentally benign biological macromolecule as a new corrosion inhibitor for oil & gas industries, *Int. J. Biol. Macromol.*, 2020, **144**, 305–315.
- 7 C. Verma, M. A. Quraishi, A. Alfantazi and K. Y. Rhee, Corrosion inhibition potential of chitosan based Schiff bases: Design, performance and applications, *Inte. J. Biol. Macromol.*, 2021, 184, 135–143.
- 8 H. L. Liu, Z. M. Zhu, J. F. Hu, X. Lai, J. Q. Qu, Inhibition of Q235 corrosion in sodium chloride solution by chitosan derivative and its synergistic effect with ZnO, *Carbohydr. Polym.*, 2022, **296**, 119936.
- 9 S. N. Dalhatu, K. N. Modu, A. A. Mahmoud, Z. U. Zango, A. B. Umar, F. Usman, J. O. Dennis, A. Alsadig, K. H. Ibnaouf and O. A. Aldaghri, L-arginine grafted chitosan as corrosion inhibitor for mild steel protection, *Polymers*, 2023, 15, 398.
